# Supplementary material for: Siblings and Early Childhood Development: Evidence from a Population-Based Cohort in Preschoolers from Shanghai
Source: MDPI journal article supplement (doi:10.3390/ijerph19095739), 2022-05-09
Supplement: s1 [file s1]

### Supplementary Material

**Figure S1. Locally weighted smoothing plots for SDQ subdomains over age in different children groups. (add annotations for single, younger, etc.)**

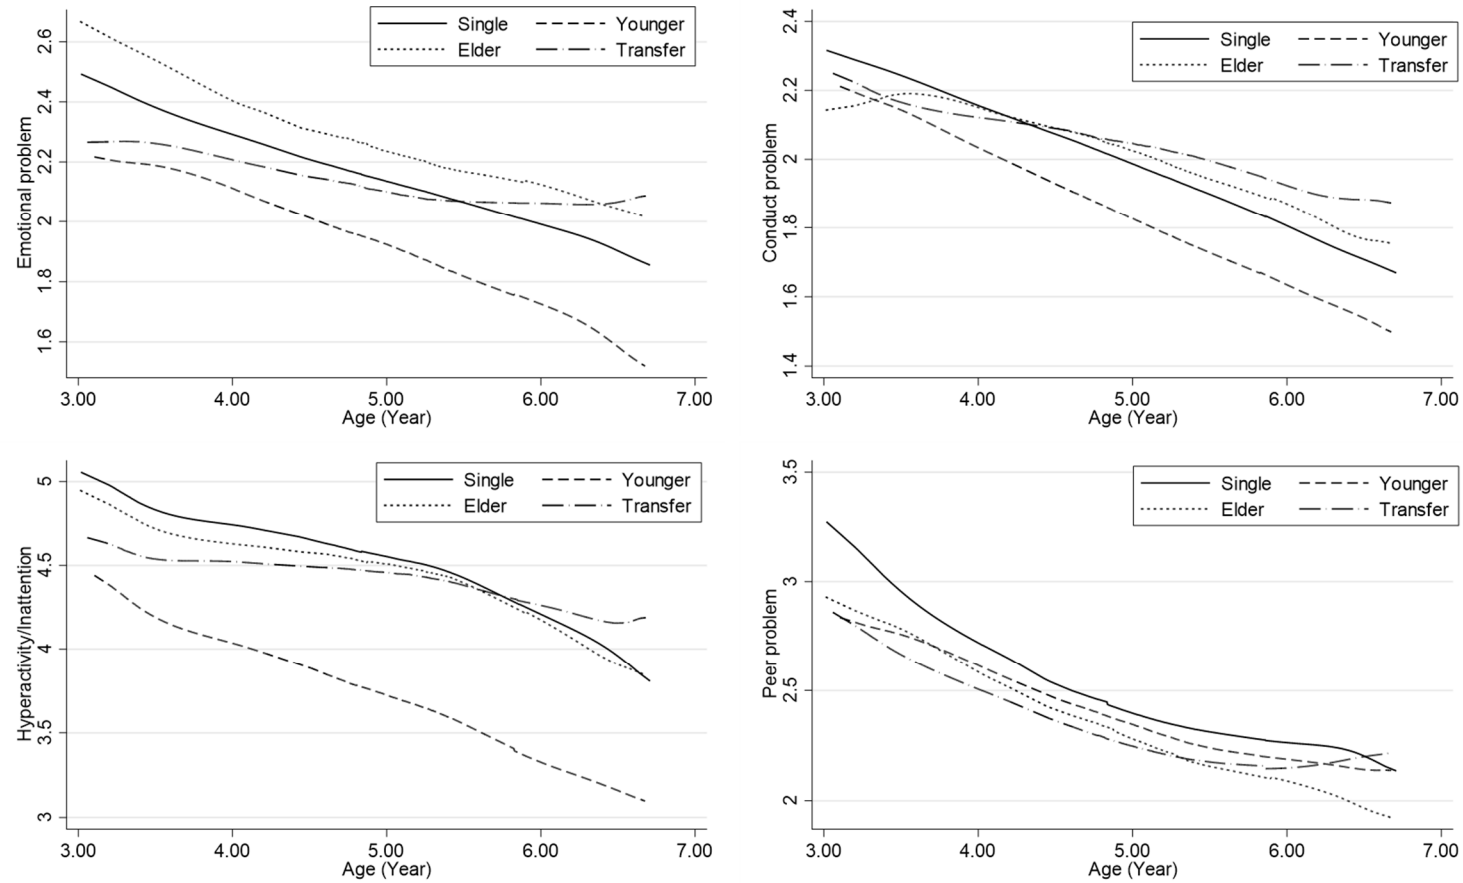

Transfer: Single-elder transfer group

**Figure S2. Locally weighted smoothing plots for eHCI subdomains over age in different children groups. (add annotations for single, younger, etc.)**

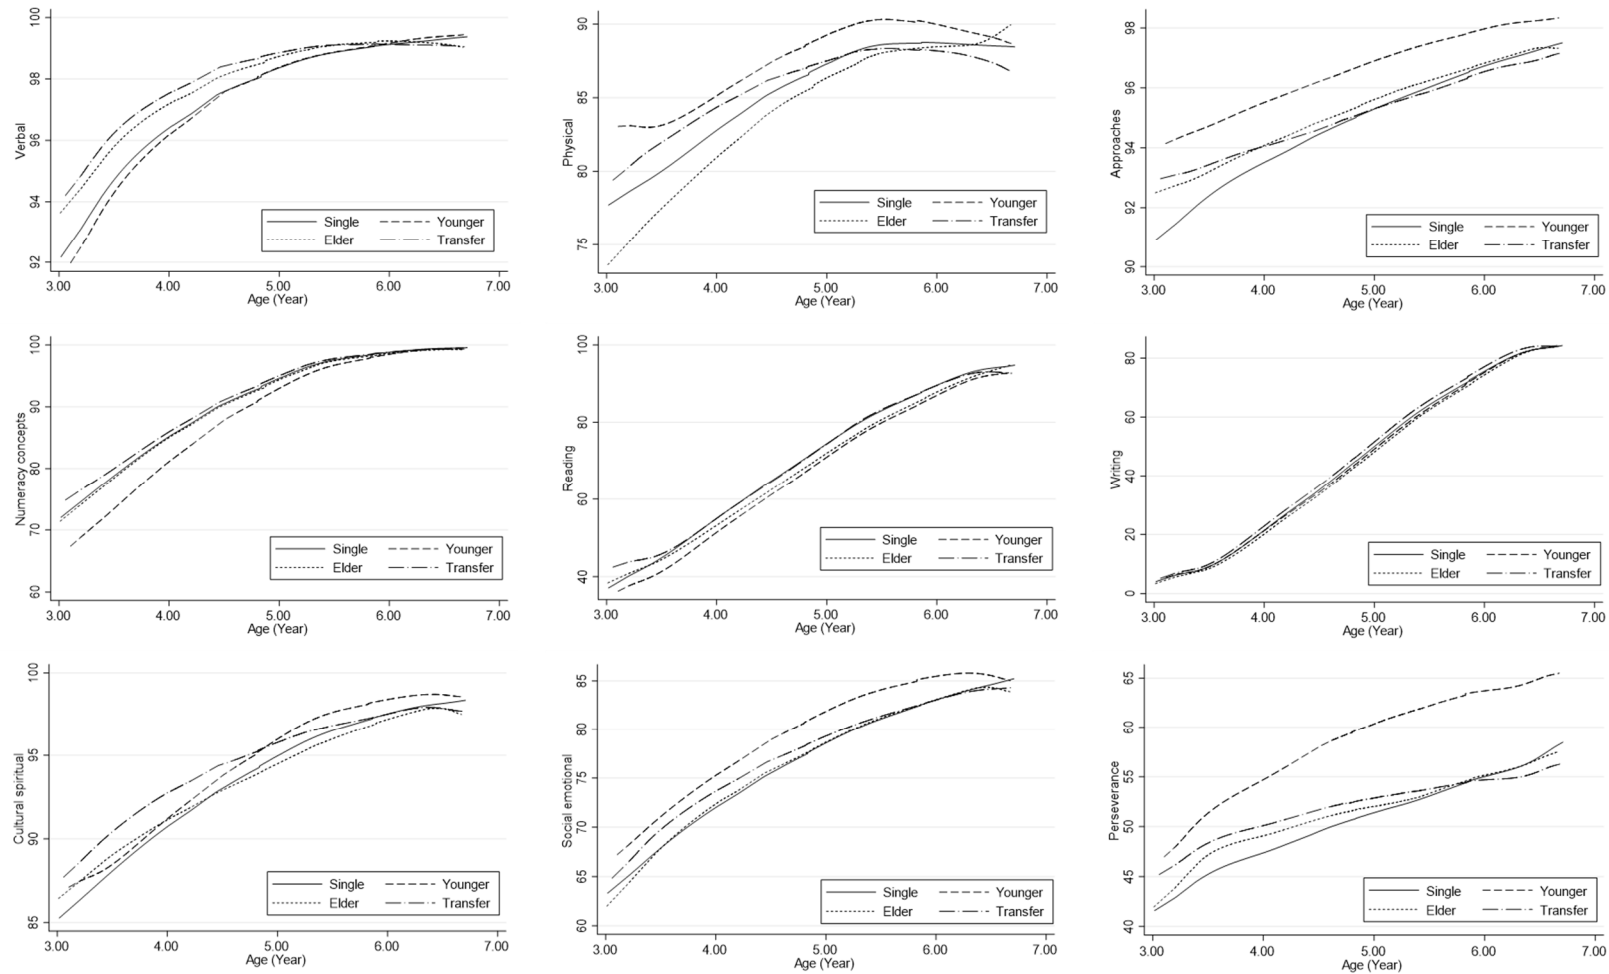

Transfer: Single-elder transfer group

**Table S1. Mixed effects model results for subdomains of SDQ and eHCI in each children group compared with single group.**

|                           |                           | Younger                   |                  | Elder                     |                  | Single-elder transfer     |                  |
|---------------------------|---------------------------|---------------------------|------------------|---------------------------|------------------|---------------------------|------------------|
|                           |                           | Adjusted $\beta$ (95% CI) | 2-Tailed P value | Adjusted $\beta$ (95% CI) | 2-Tailed P value | Adjusted $\beta$ (95% CI) | 2-Tailed P value |
| <b>SDQ</b>                |                           |                           |                  |                           |                  |                           |                  |
| Emotional symptoms        | Initial status            | -0.10 (-0.28, 0.09)       | 0.306            | 0.06 (-0.13, 0.24)        | 0.556            | -0.12 (-0.29, 0.06)       | 0.192            |
|                           | Rate of change (per year) | -0.06 (-0.14, 0.01)       | 0.111            | 0.03 (-0.05, 0.11)        | 0.418            | 0.06 (-0.02, 0.14)        | 0.119            |
| Conduct problems          | Initial status            | -0.11 (-0.25, 0.03)       | 0.133            | -0.06 (-0.20, 0.08)       | 0.386            | -0.10 (-0.23, 0.03)       | 0.122            |
|                           | Rate of change (per year) | -0.03 (-0.09, 0.03)       | 0.388            | 0.05 (-0.01, 0.11)        | 0.126            | 0.08 (0.02, 0.14)         | 0.007            |
| Hyperactivity/inattention | Initial status            | -0.66 (-0.85, -0.48)      | <.001            | -0.03 (-0.23, 0.18)       | 0.796            | -0.40 (-0.59, -0.22)      | <.001            |
|                           | Rate of change (per year) | -0.09 (-0.17, -0.02)      | 0.017            | 0.01 (-0.08, 0.09)        | 0.870            | 0.18 (0.10, 0.26)         | <.001            |
| Peer relationship         | Initial status            | -0.10 (-0.24, 0.05)       | 0.181            | -0.03 (-0.19, 0.14)       | 0.758            | -0.19 (-0.34, -0.03)      | 0.020            |
|                           | Rate of change (per year) | -0.01 (-0.07, 0.05)       | 0.707            | -0.04 (-0.11, 0.03)       | 0.266            | 0.04 (-0.02, 0.11)        | 0.213            |
| <b>eHCI</b>               |                           |                           |                  |                           |                  |                           |                  |
| Verbal                    | Initial status            | 0.55 (-0.52, 1.62)        | 0.315            | 2.21 (1.17, 3.25)         | <.001            | 2.47 (1.56, 3.38)         | <.001            |
|                           | Rate of change (per year) | -0.25 (-0.68, 0.18)       | 0.248            | -0.86 (-1.30, -0.42)      | <.001            | -0.95 (-1.34, -0.56)      | <.001            |
| Physical                  | Initial status            | 4.00 (2.04, 5.96)         | <.001            | -0.88 (-3.23, 1.47)       | 0.465            | 2.40 (0.44, 4.36)         | 0.017            |
|                           | Rate of change (per year) | -1.10 (-1.91, -0.30)      | 0.007            | -0.06 (-1.05, 0.93)       | 0.902            | -1.10 (-1.94, -0.27)      | 0.010            |
| Approaches                | Initial status            | 2.73 (1.53, 3.94)         | <.001            | 1.39 (-0.14, 2.91)        | 0.076            | 1.96 (0.75, 3.18)         | 0.001            |
|                           | Rate of change (per year) | -0.60 (-1.11, -0.09)      | 0.022            | -0.54 (-1.21, 0.12)       | 0.109            | -0.95 (-1.47, -0.42)      | <.001            |
| Numeracy Concepts         | Initial status            | -3.84 (-5.28, -2.39)      | <.001            | 1.55 (-0.02, 3.12)        | 0.053            | 2.00 (0.66, 3.34)         | 0.003            |
|                           | Rate of change (per year) | 1.49 (0.93, 2.06)         | <.001            | -0.67 (-1.31, -0.03)      | 0.041            | -0.76 (-1.31, -0.20)      | 0.007            |
| Reading                   | Initial status            | -2.60 (-4.59, -0.60)      | 0.011            | 0.18 (-2.12, 2.49)        | 0.877            | 0.51 (-1.67, 2.68)        | 0.648            |

|                    |                           |                     |       |                      |       |                      |       |
|--------------------|---------------------------|---------------------|-------|----------------------|-------|----------------------|-------|
| Writing            | Rate of change (per year) | 0.71 (-0.06, 1.48)  | 0.069 | -0.78 (-1.68, 0.12)  | 0.091 | -0.12 (-0.97, 0.72)  | 0.774 |
|                    | Initial status            | 2.52 (0.32, 4.72)   | 0.025 | -1.99 (-4.38, 0.40)  | 0.103 | -0.88 (-2.98, 1.21)  | 0.408 |
| Cultural spiritual | Rate of change (per year) | -0.85 (-1.83, 0.13) | 0.090 | 0.07 (-0.98, 1.13)   | 0.891 | 0.74 (-0.19, 1.66)   | 0.119 |
|                    | Initial status            | 0.79 (-0.87, 2.46)  | 0.350 | 1.88 (-0.07, 3.82)   | 0.058 | 2.87 (1.44, 4.30)    | <.001 |
| Social emotional   | Rate of change (per year) | 0.18 (-0.51, 0.87)  | 0.608 | -1.03 (-1.86, -0.21) | 0.014 | -1.07 (-1.65, -0.49) | <.001 |
|                    | Initial status            | 3.71 (1.94, 5.48)   | <.001 | 0.83 (-1.20, 2.86)   | 0.425 | 2.56 (0.84, 4.28)    | 0.004 |
| Perseverance       | Rate of change (per year) | -0.42 (-1.12, 0.28) | 0.238 | -0.49 (-1.33, 0.35)  | 0.257 | -1.07 (-1.76, -0.38) | 0.002 |
|                    | Initial status            | 6.36 (3.63, 9.09)   | <.001 | 2.71 (-0.23, 5.65)   | 0.071 | 3.52 (1.04, 6.01)    | 0.005 |
|                    | Rate of change (per year) | 0.93 (-0.20, 2.06)  | 0.108 | -1.09 (-2.32, 0.13)  | 0.081 | -1.43 (-2.47, -0.40) | 0.007 |

---

Adjusting for potential confounders including kindergarten education, age, gender, Hukou (location of registered residency of the child), mother's educational levels, annual household income, primary caregiver, parental marital status, and parent-child interaction.

**Table S2.** Association between birth order and early childhood development among different SES status.

|                                       |                      | Total difficulties score  |                  | Overall development score |                  |
|---------------------------------------|----------------------|---------------------------|------------------|---------------------------|------------------|
|                                       |                      | Adjusted $\beta$ (95% CI) | 2-Tailed P value | Adjusted $\beta$ (95% CI) | 2-Tailed P value |
| <b>High school or below (n=2,381)</b> |                      |                           |                  |                           |                  |
| Initial status (at Entrance)          |                      |                           |                  |                           |                  |
| Single                                | Ref.                 |                           |                  | Ref.                      |                  |
| Younger                               | -0.23 (-1.14, 0.68)  | 0.615                     |                  | 4.56 (2.30, 6.82)         | <.001            |
| Elder                                 | 0.03 (-1.26, 1.32)   | 0.961                     |                  | 2.71 (-1.20, 6.62)        | 0.174            |
| Single-elder transfer                 | 0.25 (-1.44, 1.94)   | 0.773                     |                  | 4.84 (2.00, 7.69)         | 0.001            |
| Age                                   | -0.45 (-0.91, 0.01)  | 0.056                     |                  | 6.96 (5.99, 7.94)         | <.001            |
| Rate of change (per year)             |                      |                           |                  |                           |                  |
| Single                                | Ref.                 |                           |                  | Ref.                      |                  |
| Younger                               | -0.37 (-0.76, 0.01)  | 0.059                     |                  | -1.24 (-2.17, -0.32)      | 0.008            |
| Elder                                 | 0.17 (-0.38, 0.71)   | 0.548                     |                  | -1.52 (-3.15, 0.11)       | 0.068            |
| Single-elder transfer                 | 0.16 (-0.61, 0.93)   | 0.690                     |                  | -2.13 (-3.30, -0.96)      | <.001            |
| <b>Junior college (n=3,806)</b>       |                      |                           |                  |                           |                  |
| Initial status (at Entrance)          |                      |                           |                  |                           |                  |
| Single                                | Ref.                 |                           |                  | Ref.                      |                  |
| Younger                               | -1.40 (-2.28, -0.51) | 0.002                     |                  | 1.85 (0.07, 3.63)         | 0.041            |
| Elder                                 | 0.78 (-0.03, 1.58)   | 0.058                     |                  | -1.14 (-3.20, 0.93)       | 0.281            |
| Single-elder transfer                 | -0.68 (-1.62, 0.26)  | 0.155                     |                  | 0.66 (-1.06, 2.37)        | 0.454            |
| Age                                   | -0.93 (-1.18, -0.68) | <.001                     |                  | 6.49 (6.06, 6.92)         | <.001            |
| Rate of change (per year)             |                      |                           |                  |                           |                  |
| Single                                | Ref.                 |                           |                  | Ref.                      |                  |
| Younger                               | -0.13 (-0.53, 0.27)  | 0.533                     |                  | -0.05 (-0.77, 0.66)       | 0.882            |
| Elder                                 | -0.20 (-0.53, 0.14)  | 0.249                     |                  | -0.12 (-0.95, 0.72)       | 0.785            |

|                                  |                      |       |                     |       |
|----------------------------------|----------------------|-------|---------------------|-------|
| Single-elder transfer            | 0.22 (-0.18, 0.63)   | 0.282 | -0.14 (-0.77, 0.50) | 0.677 |
| <b>Undergraduate (n=7,595)</b>   |                      |       |                     |       |
| Initial status (at Entrance)     |                      |       |                     |       |
| Single                           | Ref.                 |       | Ref.                |       |
| Younger                          | -1.56 (-2.23, -0.89) | <.001 | 0.43 (-0.83, 1.69)  | 0.502 |
| Elder                            | -0.38 (-1.04, 0.29)  | 0.267 | 0.62 (-0.74, 1.99)  | 0.369 |
| Single-elder transfer            | -0.88 (-1.41, -0.35) | 0.001 | 0.81 (-0.34, 1.97)  | 0.169 |
| Age                              | -0.59 (-0.77, -0.41) | <.001 | 5.51 (5.18, 5.84)   | <.001 |
| Rate of change (per year)        |                      |       |                     |       |
| Single                           | Ref.                 |       | Ref.                |       |
| Younger                          | -0.10 (-0.40, 0.20)  | 0.514 | 0.61 (0.12, 1.09)   | 0.015 |
| Elder                            | 0.26 (-0.04, 0.56)   | 0.085 | -0.51 (-1.06, 0.05) | 0.075 |
| Single-elder transfer            | 0.47 (0.24, 0.71)    | <.001 | -0.43 (-0.87, 0.01) | 0.056 |
| <b>Master or above (n=1,741)</b> |                      |       |                     |       |
| Initial status (at Entrance)     |                      |       |                     |       |
| Single                           | Ref.                 |       | Ref.                |       |
| Younger                          | -0.91 (-2.76, 0.95)  | 0.338 | 3.19 (0.67, 5.72)   | 0.013 |
| Elder                            | 0.26 (-0.82, 1.34)   | 0.633 | 0.44 (-1.95, 2.84)  | 0.717 |
| Single-elder transfer            | -0.80 (-1.82, 0.23)  | 0.127 | 1.84 (-0.30, 3.97)  | 0.091 |
| Age                              | -0.53 (-0.89, -0.17) | 0.004 | 5.54 (4.91, 6.17)   | <.001 |
| Rate of change (per year)        |                      |       |                     |       |
| Single                           | Ref.                 |       | Ref.                |       |
| Younger                          | -0.43 (-1.26, 0.40)  | 0.311 | -0.52 (-1.60, 0.55) | 0.341 |
| Elder                            | -0.41 (-0.88, 0.06)  | 0.087 | 0.07 (-0.90, 1.04)  | 0.894 |
| Single-elder transfer            | 0.36 (-0.10, 0.82)   | 0.129 | -0.43 (-1.29, 0.44) | 0.332 |

Adjusting for potential confounders including kindergarten education, gender, Hukou (location of registered residency of the child), annual household income, primary caregiver, parental marital status, and parent-child interaction.

**Table S3. Association between sibling age gaps and children's early childhood development.**

|                                | Total difficulties score  |                  | Overall development score |                  |
|--------------------------------|---------------------------|------------------|---------------------------|------------------|
|                                | Adjusted $\beta$ (95% CI) | 2-Tailed P value | Adjusted $\beta$ (95% CI) | 2-Tailed P value |
| Initial status (at Entrance)   |                           |                  |                           |                  |
| Single                         | Ref.                      |                  | Ref.                      |                  |
| Younger with age gap $\geq 9y$ | -0.12 (-0.98, 0.75)       | 0.790            | 2.04 (0.00, 4.09)         | 0.050            |
| Younger with age gap 6y to 9y  | -1.73 (-2.77, -0.70)      | 0.001            | 1.68 (-0.28, 3.63)        | 0.093            |
| Younger with age gap 3y to 6y  | -1.07 (-1.78, -0.37)      | 0.003            | 1.62 (0.22, 3.02)         | 0.024            |
| Younger with age gap $< 3y$    | -0.75 (-1.58, 0.09)       | 0.081            | 1.10 (-0.45, 2.65)        | 0.164            |
| Elder                          | -0.06 (-0.51, 0.40)       | 0.798            | 0.90 (-0.16, 1.96)        | 0.097            |
| Single-elder transfer          | -0.81 (-1.25, -0.37)      | $<.001$          | 1.97 (1.08, 2.85)         | $<.001$          |
| Age                            | -0.64 (-0.78, -0.49)      | $<.001$          | 6.07 (5.78, 6.35)         | $<.001$          |
| Rate of change (per year)      |                           |                  |                           |                  |
| Single                         | Ref.                      |                  | Ref.                      |                  |
| Younger with age gap $\geq 9y$ | -0.36 (-0.66, -0.05)      | 0.021            | -0.43 (-1.20, 0.34)       | 0.271            |
| Younger with age gap 6y to 9y  | 0.15 (-0.31, 0.61)        | 0.534            | -0.03 (-0.79, 0.74)       | 0.943            |
| Younger with age gap 3y to 6y  | -0.21 (-0.53, 0.10)       | 0.186            | 0.14 (-0.46, 0.73)        | 0.654            |
| Younger with age gap $< 3y$    | -0.31 (-0.68, 0.05)       | 0.092            | 0.13 (-0.45, 0.71)        | 0.663            |
| Elder                          | 0.05 (-0.15, 0.25)        | 0.630            | -0.61 (-1.05, -0.17)      | 0.007            |
| Single-elder transfer          | 0.37 (0.18, 0.56)         | $<.001$          | -0.75 (-1.10, -0.40)      | $<.001$          |

Adjusting for potential confounders including kindergarten education, age, gender, Hukou (location of registered residency of the child), mother's educational levels, annual household income, primary caregiver, parental marital status, and parent-child interaction.
